# Supplementary material for: The comprehensive expression analysis of circular RNAs in gastric cancer and its association with field cancerization
Source: PubMed Central journal article supplement (PMC5673933; doi:10.1038/s41598-017-15061-w), 2017-11-06
Supplement: 41598_2017_15061_MOESM1_ESM.pdf [file 41598_2017_15061_MOESM1_ESM.pdf]

## **The comprehensive expression analysis of circular RNAs in gastric cancer and its association with field cancerization**

Amanda Ferreira Vidal<sup>1§</sup>, André M. Ribeiro-dos-Santos<sup>1§</sup>, Tatiana Vinasco-Sandoval<sup>1</sup>, Leandro Magalhães<sup>1</sup>, Pablo Pinto<sup>1</sup>, Ana KM Anaissi<sup>2</sup>, Samia Demachki<sup>2</sup>, Paulo Pimentel de Assumpção<sup>2</sup>, Sidney Emanuel Batista dos Santos<sup>1,2</sup>, Ândrea Ribeiro-dos-Santos<sup>1,2</sup>

<sup>1</sup> Laboratory of Human and Medical Genetics, Federal University of Pará, Belém, Pará, Brazil.

<sup>2</sup> Center of Oncology Research, Federal University of Pará, Belém, Pará, Brazil.

§These authors contributed equally to this work.

Correspondence and requests for materials should be addressed to Â. Ribeiro-dos-Santos. (akelyufpa@gmail.com)

**Supplementary information**

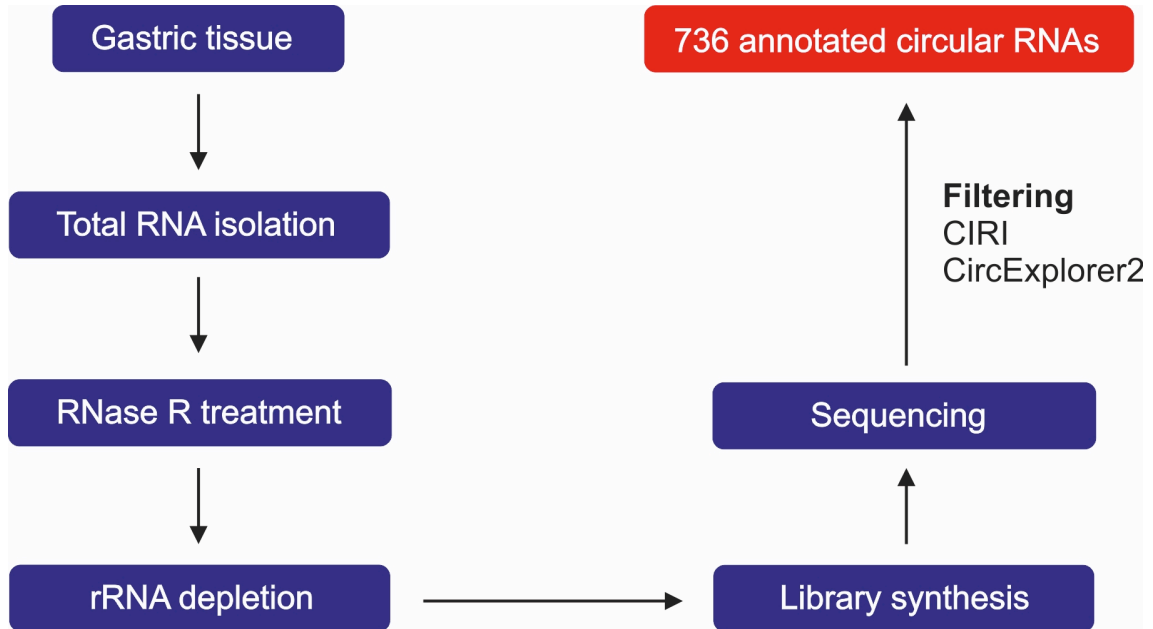

**Supplementary Fig. 1 | Circular RNAs detection workflow.**

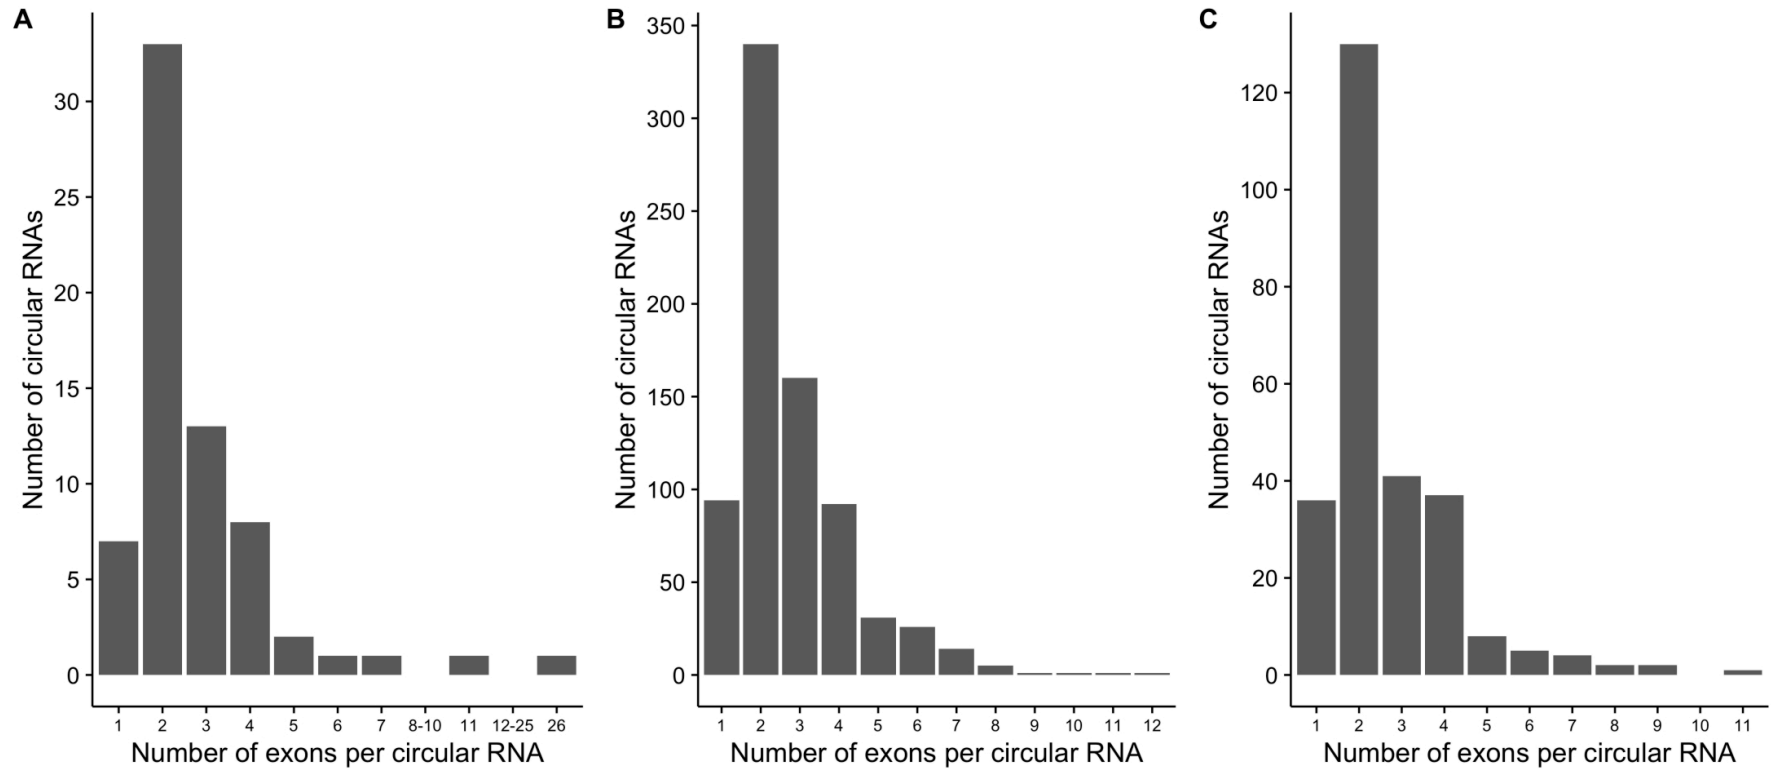

**Supplementary Fig. 2 | Number of exons per annotated circular RNAs in gastric tissue. (A) Gastric tissue without gastric cancer. (B) Matched tumor-adjacent gastric tissue. (C) Gastric cancer.**

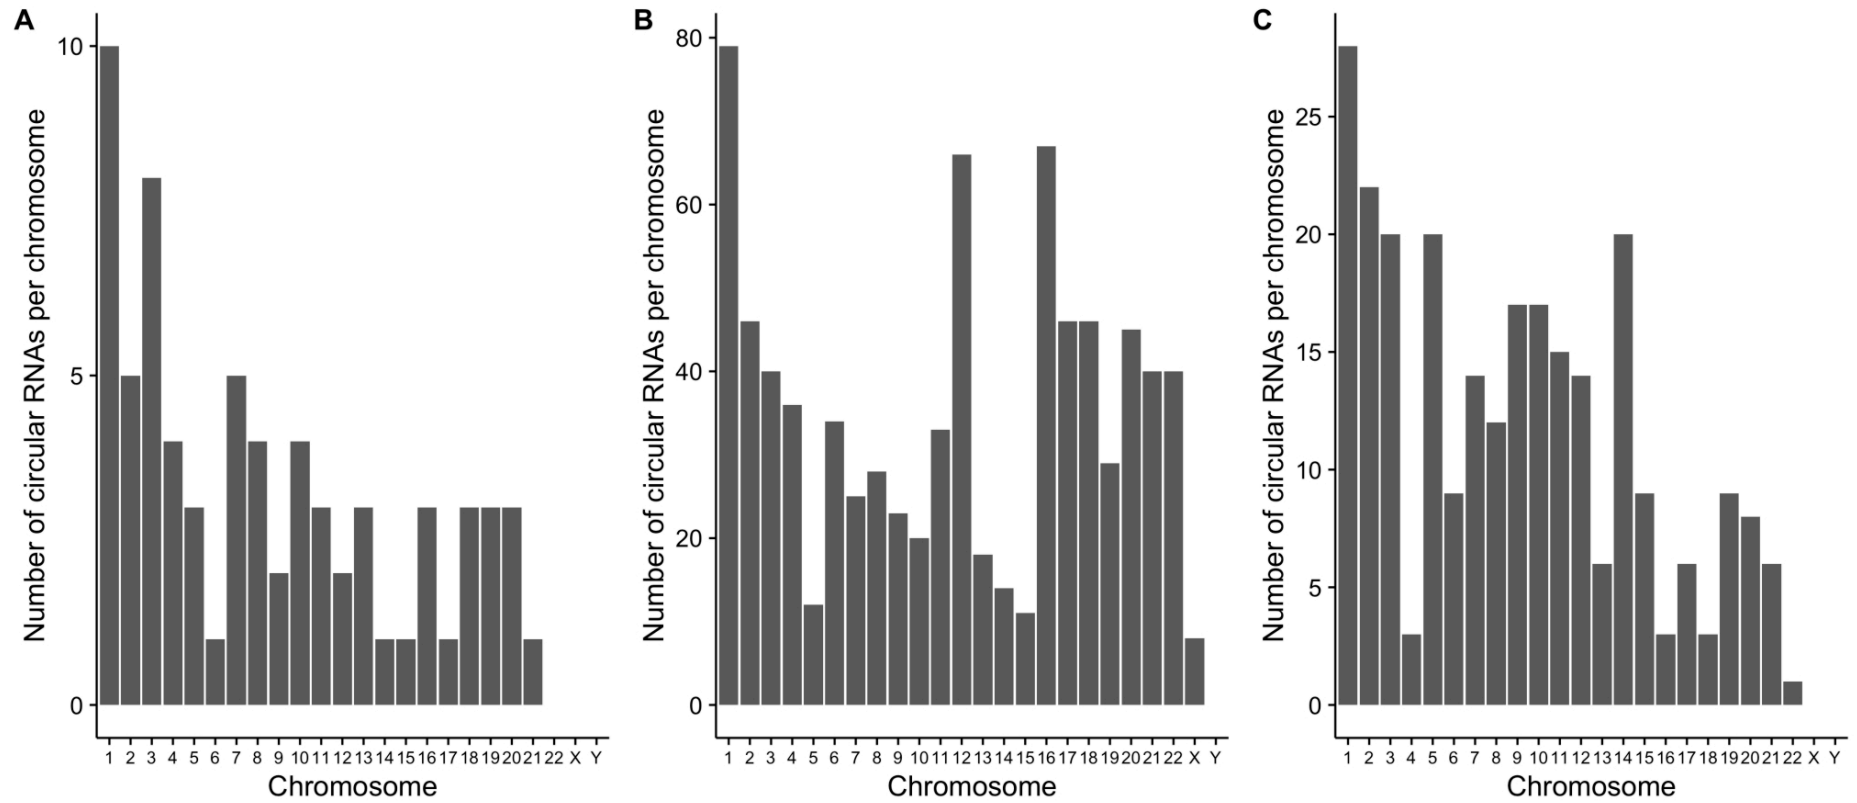

**Supplementary Fig. 3 | Number of circular RNAs per human chromosome.** (A) Gastric tissue without gastric cancer. (B) Matched tumor-adjacent gastric tissue. (C) Gastric cancer.

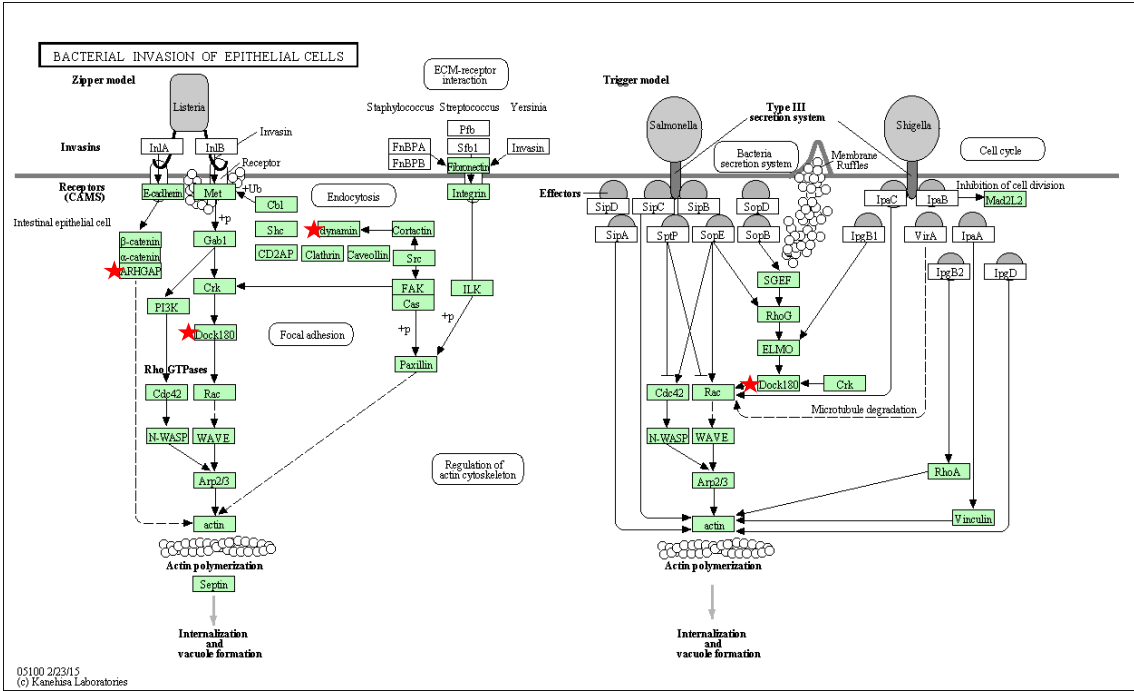

**Supplementary Fig. 4 | Scheme of the KEGG pathway of bacterial invasion of epithelial cells<sup>30</sup>.** This pathway was enriched in gastric tissue without gastric cancer and in matched adjacent tumor gastric tissue.
